# Supplementary material
Source: publisher site journal article supplement (https://www.dovepress.com/article/357394)
Supplement: Supplementary file 1 [file get_supplementary_file.php]

**Supplementary material**

**Supplementary Table 1. List of primers used for real-time PCR in hPSCs**

| Gene | Primer sequences (5’ to 3’) |
| --- | --- |
| GAPDH | F: AATCCCACTACCATCTTCCA  R: TGGACTCCACGACGTACTCA |
| α-SMA | F: CGTGGCTATTCCTTCGTTACTA  R: ATCAGGCAACTCGTAACTCTTC |
| COL Ⅰ | F: AATTGGAGCTGTTGGTAACGC  R: CACCAGTAAGGCCGTTTGC |
| SOD1 | F: ACAAAGATGGTGTGGCCGAT  R: AACGACTTCCAGCGTTTCCT |
| SOD2 | F: ACTAGCAGCATGTTGAGCCG  R:GGCTGAAGAGCTATCTGGGC |
| SOD3 | F: GAGGTCTCACCTTCGCCTTT  R:GGAGTCTCAGGGCTTATGGG |
| GPx1 | F: TATCGAGAATGTGGCGTCCC  R: TCTTGGCGTTCTCCTGATGC |
| GPx3 | F: AGAAGTCGAAGATGGACTGCC  R: AGGGAAAGCCCAGAATGACC |
| GPx4 | F: ATTGGTCGGCTGGACGAGG  R: CGATGTCCTTGGCGGAAAAC |
| GPx8 | F: GCCTTTGAAGTGAAGGATGCAAA  R: GGAAAAGCCAACACGCTGAA |
| CAT | F: AGTGATCGGGGGATTCCAGA  R: GAGGGGTACTTTCCTGTGGC |
| NOX1 | F: TGTCGCAATCTGCTGTCCTT  R: GTCGTGTTTCGGGACTGGAT |
| NOX4 | F: CACCAGATGTTGGGGCTAGG  R: TGATCCTCGGAGGTAAGCCA |
| NOX5 | F: GACATCGATGGCAGTGGCTC  R: GTCAGGTTCTCCATGACTCCG |
| DUOX1 | F: TTCATCATGGGCTTCTGCCT  R: CACCCATCAAATCGCTGCAC |
| DUOX2 | F: CCTGCCCTCAACCTAAGCAG  R: CCGGAAATAGGCCACCACTC |

F: forward; R: reverse.

**Supplementary Table 2. List of primers used for real-time PCR in animal experiments**

| Gene | Primer sequences (5’ to 3’) |
| --- | --- |
| β-actin | F: GTGACGTTGACATCCGTAAAGA  R: GCCGGACTCATCGTACTCC |
| COL III | F: CTGTAACATGGAAACTGGGGAAA  R: CCATAGCTGAACTGAAAACCACC |
| COL Ⅰ | F: GAGCGGAGAGTACTGGATCG  R: GTTCGGGCTGATGTACCAGT |
| SOD1 | F: AACCAGTTGTGTTGTCAGGAC  R: CCACCATGTTTCTTAGAGTGAGG |
| SOD2 | F: CAGACCTGCCTTACGACTATGG  R: CTCGGTGGCGTTGAGATTGTT |
| GPx1 | F: CCACCGTGTATGCCTTCTCC  R: AGAGAGACGCGACATTCTCAAT |
| GPx3 | F: CCTTTTAAGCAGTATGCAGGCA  R: CAAGCCAAATGGCCCAAGTT |
| GPx4 | F: TGTGCATCCCGCGATGATT  R: CCCTGTACTTATCCAGGCAGA |
| GPx8 | F: CCTTTCGCTGCCTACCCATTA  R: TGCACAGAACCATAGAGAGCAA |
| CAT | F: GGAGGCGGGAACCCAATAG  R: GTGTGCCATCTCGTCAGTGAA |
| NOX1 | F: ACAGAGGAGAGCTTGGGTGA  R: TATGGTCATCCCACTCGTGA |
| NOX2 | F: ACTGCGGAGAGTTTGGAAGA  R: GGTGATGACCACCTTTTGCT |

F: forward; R: reverse.

**Supplementary Table 3. List of antibodies for western blotting analysis.**

| **Antibody** | **Catalog number** | **Species** | **Company** |
| --- | --- | --- | --- |
| GAPDH | 2118 | Rabbit | Cell Signaling Technology |
| α-SMA | ab5694 | Rabbit | Abcam |
| Collagen I  GPX8  CAT | 84336  16846  66765 | Rabbit  Rabbit  Mouse | Cell Signaling Technology  Proteintech  Proteintech |
| IRDye®:680RD | 926-68071 | Goat anti-Rabbit | LI-COR |

®: Trademark has been registered.
